# Supplementary material for: Population genetics and phylogeographic history of the insular lizard Podarcis lilfordi (Gunther, 1874) from the Balearic Islands based on genome‐wide polymorphic data
Source: PubMed Central journal article supplement (PMC11116764; doi:10.1002/ece3.11407), 2024-05-23

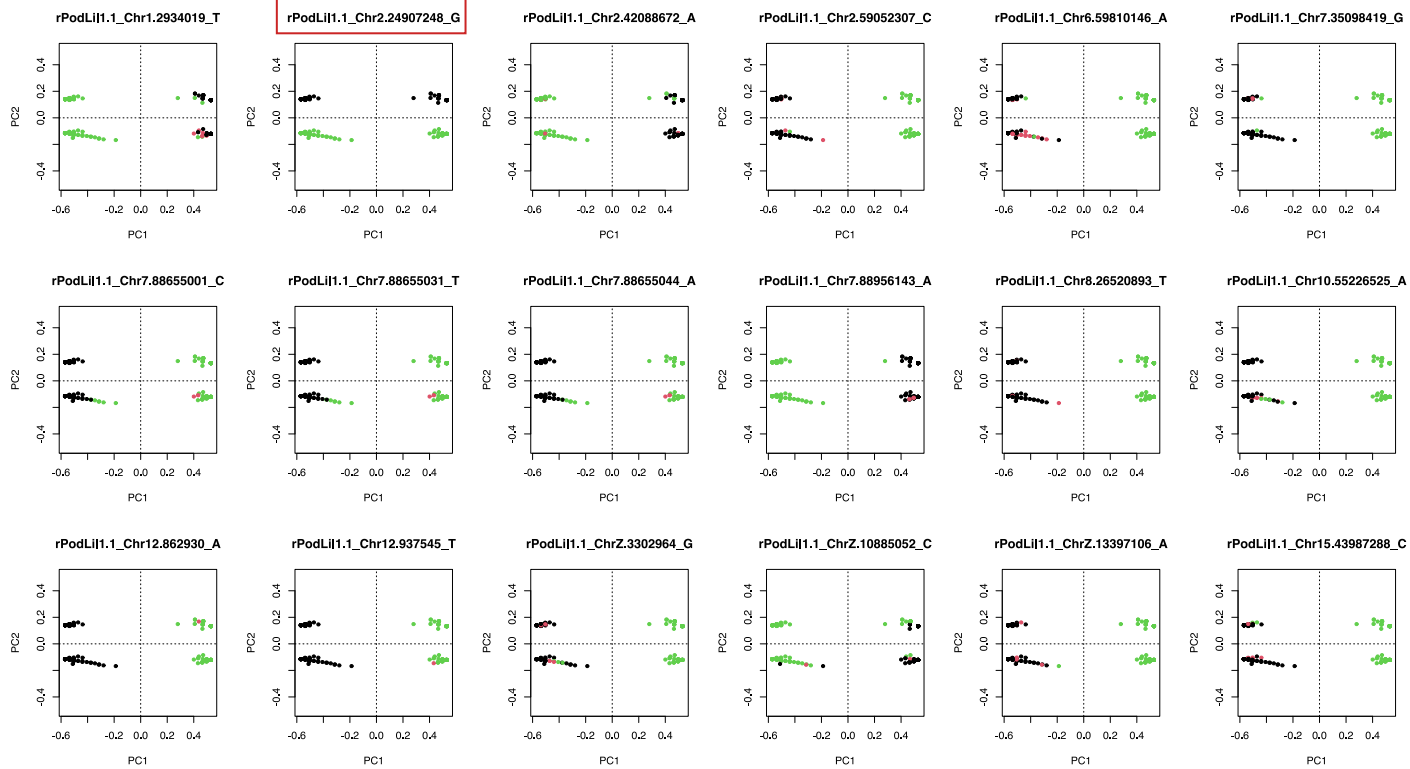

Supplement: ECE3-14-e11407-s001.pdf [file ECE3-14-e11407-s001.pdf]
